# Supplementary material
Source: PubMed Central journal article supplement (PMC4983653)
Supplement: supp_kww018_kww018supp.pdf [file supp_kww018_kww018supp.pdf]

**Web Appendix : Acknowledgments by Study** (listed by location and name in alphabetical order). Further information can be found in study references and websites, and <https://clic.berkeley.edu>.

### **Brazil, BCSG-IAL**

**Research and Clinical Investigators:** Maria S. Pombo-de-Oliveira, Sergio Koifman, Fernando A Werneck, Jane Dobbin, Mariana Emerenciano, Marcela B. Mansur , Jeniffer D. Ferreira, and Arnaldo C. Couto (Rio de Janeiro); Isis Q. Magalhães and José C. Cordoba (Brasilia); Vitória R.Pereira Pinheiro and Silvia R. Brandalise (Campinas); Imaruí Costa (Florianopolis); Mara A.D. Pianovsky, Flora M.Watanabe (Parana); Núbia Mendonça, Nilma Pimentel Brito, Eny Guimarães de Carvalho, and Ana Maria Marinho (Salvador); Virginia M. Cóser (Santa Maria); Gilberto Ramos (Belo Horizonte); Flávia Pimenta; Andreia Gadelha (Joao Pessoa); Cesar Bariani (Goiania); Marcelo S. Santos and Rosania Baseggio (Campo Grande); Alejandro Aranciba and Renato Melarangno (São Paulo). **Funding:** Brazilian National Research Council (CNPq), the State of Rio de Janeiro Research Foundation (FAPERJ), the Ministry of Health of Brazil, and the Swiss Bridge Foundation.

### **Costa Rica**

**Research Investigators:** Catharina Wesseling, Patricia Monge and Timo Partanen (Universidad Nacional, Costa Rica); Anders Ahlbom and Elisabete Weiderpass (Karolinska Insitutet, Sweden), and Kenneth Cantor (National Cancer Institute, USA). **Funding:** Research Department of the Swedish International Development Cooperation Agency (Sida/SAREC) and National Cancer Institute, USA.

**France, ADELE & ESCALE** (<http://www.cress-umr1153.fr/en/>)

**Research Investigator:** Jacqueline Clavel (Inserm, CRESS, Université Paris Descartes).

**Funding:** Inserm, the Fondation de France, ARC, the Agence Française de Sécurité Sanitaire des Produits de Santé (AFSSAPS), the Agence Française de Sécurité Sanitaire de l'Environnement et du Travail (AFSSET), the association Cent pour Sang la vie, the Institut National du Cancer (INCa), the Agence Nationale de la Recherche (ANR), and the Cancéropôle Ile de France.

**Germany, German Childhood Cancer Registry (GCCR)**

**Research Investigators:** Peter Kaatsch, Uwe Kaletsch, Rolf Meinert and Jörg Michaelis (Johannes Gutenberg-University Mainz); Joachim Schüz (now at: International Agency for Research on Cancer). **Funding:** Federal Ministry of the Environment, Nuclear Safety and Nature Preservation.

**Greece, NARECHEM**

**Research and Clinical Investigators:** Eleni Petridou, Nick Dessypris Evdoxia Bouka, Maria Karalexi and Thomas Thomopoulos (National and Kapodistrian University of Athens, Medical School ); Margarita Baka (Children's Hospital, Athens, Greece); Maria Moschovi (National and Kapodistrian University of Athens, Medical School); Sophia Polychronopoulou ("Aghia Sophia" General Children's Hospital, Athens, Greece); Fani Athanassiadou (Aristotelion University of Thessaloniki, AHEPA General Hospital, Greece); Vassiliki Sidi (Hippokration Hospital, Thessaloniki, Greece), and Efthymia Stiakaki (University Hospital of Heraklion, Greece). **Funding:** European Union at specified time periods, Onassis Public Benefit Foundation for specific PhD and University of Athens.

## **Italy, SETIL**

**Research and Clinical Investigators:** Maurizio Aricò and Gabriella Bernini (AOU Meyer, Firenze); Antonio Acquaviva (AOU di Siena); Giorgio Assennato (ARPA, Bari); Giuseppe Basso, Stefania Varotto and Paola Zambon (Università di Padova); Pierfranco Biddau (Ospedale Microcitemico, Cagliari); Luigi Bisanti (ASL di Milano); Francesco Bochicchio, Susanna Lagorio, Cristina Nuccetelli, Alessandro Polichetti, Serena Risica, and Paolo Vecchia (ISS, Roma); Santina Cannizzaro and Lorenzo Gafà (LILT, Ragusa); Egidio Celentano (ARSan, Napoli); Pierluigi Cocco (Università di Cagliari); Marina Cuttini and Paolo Tamaro (IRCCS Burlo Garofolo, Trieste); Francesco Forastiere and Ursula Kirchmayer and Paola Michelozzi (Dipartimento Epidemiologia Regione Lazio, Roma); Riccardo Haupt (Istituto Giannina Gaslini, Genova); Franco Locatelli (Università di Pavia); Lia Lidia Luzzatto (Ospedale Pediatrico Regina Margherita, Torino); Giuseppe Masera and Carmelo Rizzar (Università Milano Bicocca, Monza); Pia Massaglia (Università di Torino); Stefano Mattioli, Guido Paolucci and Andrea Pession (Università di Bologna); Domenico Franco Merlo (INRC, Genova); Liliana Minelli (Università degli Studi di Perugia); Paola Mosciatti and Franco Pannelli (Università di Camerino); Vincenzo Poggi (AORN Santobono – Pausilipon, Napoli); Alessandro Pulsoni (Sapienza University, Roma); Roberto Rondelli (Policlinico S.Orsola, Bologna); Giovanna Russo and Gino Schilirò (Università di Catania); Alberto Salvan (IASI-CNR, Roma); Maria Valeria Torregrossa (Università degli Studi di Palermo). **Funding:** Italian Association on Research on Cancer, Ministry of Instruction, University and Research, PRIN Program), Ministry of Health (Ricerca Sanitaria Finalizzata Program), Ministry of Labour and Welfare, Associazione Neuroblastoma, Piemonte Region (Ricerca Sanitaria Finalizzata Program), Liguria Region, Comitato per la vita

"Daniele Chianelli" - Associazione per la Ricerca e la Cura delle Leucemie, Linfomi e Tumori di Adulti e Bambini (Perugia).

### **Mexico, MIGICCL**

**Research and Clinical Investigators:** The Instituto Mexicano del Seguro Social (IMSS):

UMAE Hospital de Pediatría del Centro Medico Nacional Siglo XXI, Hospital General del Centro Medico Nacional La Raza "Dr. Gaudencio González Garza", Hospital General Regional No. 1 "Dr. Carlos McGregor Sánchez Navarro", Hospital General Zona (HGZ) No. 32 "Villa Coapa", HGZ No. 27 "Tlatelolco", HGZ No. 72 "Dr. Vicente Santos Guajardo", HGR No. 25 "Ignacio Zaragoza", HGZ/UMF No. 8 "Dr. Gilberto Flores Izquierdo", HGZ/UMF No. 29 S.

Juan de Aragón, HGZ No. 47 "Vicente Guerrero"; hospitals from the Secretaria de Salud (SS):

Hospital Infantil de México Federico Gómez, Instituto Nacional de Pediatría, Hospital Juárez de México, Hospital Pediátrico de Moctezuma, Hospital General de México, Hospital Juárez del Centro, Hospital Pediátrico de Tacubaya, Hospital Pediátrico La Villa, Hospital Pediátrico Iztacalco, Hospital Pediátrico Iztapalapa, Hospital General de Ecatepec "Las Américas",

Hospital General "Dr. Manuel Gea González", Hospital Pediátrico de San Juan de Aragón del Gobierno del D.F., Hospital Juárez de Centro; and hospitals from the Instituto de Seguridad y

Servicios Sociales de los Trabajadores del Estado (ISSSTE): Centro Médico Nacional "20 de Noviembre" and Hospital Regional "1° de Octubre". **Funding:** Consejo Nacional de Ciencia y

Tecnología: Grant numbers: SALUD-2010-1-141026, IMSS/FIS/PROT 895; PDCPN2013-01-215726, FIS/IMSS/PROT/1364; Instituto Mexicano del Seguro Social: Grant numbers:

FIS/IMSS/PROT/PRIO/11/017, FIS/IMSS/PROT/G12/1134 and

FIS/IMSS/PROT/PRIO/14/031.

### **New Zealand, NZCCS**

**Research Investigators:** John D Dockerty, Peter G Herbison, David CG Skegg and J Mark Elwood (University of Otago). **Funding:** Health Research Council of NZ, the NZ Lottery Grants Board, the Otago Medical School (Faculty Bequest Funds), the Cancer Society of NZ, the Otago Medical Research Foundation, and the A.B. de Lautour Charitable Trust.

### **United Kingdom, UKCCS ([www.ukccs.org](http://www.ukccs.org))**

**Research Investigators:** Eve Roman and Tracy Lightfoot (University of York), part of a team of 10 clinical and epidemiological investigators, and two biological investigators (university departments, research institutes, and the National Health Service in Scotland). **Funding:** Leukaemia and Lymphoma Research.

### **United States, California State, CCLS**

**Research and Clinical Investigators:** Catherine Metayer (and late Patricia A Buffler) (University of California, Berkeley); Jonathan Ducore (University of California Davis Medical Center); Mignon Loh and Dr Katherine Matthay (University of California San Francisco), Children's Hospital of Central California (Dr. Vonda Crouse), Lucile Packard Children's Hospital (Dr. Gary Dahl), Children's Hospital Oakland (Dr. James Feusner), Kaiser Permanente Sacramento (Dr. Vincent Kiley), Kaiser Permanente Santa Clara (Dr. Carolyn Russo and Dr. Alan Wong), Kaiser Permanente San Francisco (Dr. Kenneth Leung), and Kaiser Permanente Oakland (Dr. Stacy Month). **Funding:** National Institute of Environmental Health Sciences, USA and the CHILDREN with CANCER, UK.

### **United States, Washington State**

**Research Team:** Beth Mueller, Dave Doody (Fred Hutchinson Cancer Research Center; Dr. Mueller also affiliated with the University of Washington); Bill O'Brien (data management/programming at the University of Washington). Data access: The Washington State Department of Health. Cancer Registries funded by the Cancer Surveillance System of Western Washington (part of the Surveillance, Epidemiology, and End Results (SEER) Program of the National Cancer Institute, and the Washington State Cancer Registry (part of the Centers for Disease Control National Program of Cancer Registries). Research work funded in part by the Fred Hutchinson Cancer Research Center, and NCI Contract # HHSN261201000094P.

**Web Table 1.** Study Characteristics and Availability of Smoking Data for Acute Myeloid Leukemia Cases and Controls, Childhood Leukemia International Consortium, 1974-2012

| First Author, Year<br>(Reference No.) | Country (Study Name)                | Study Characteristics |          |       |       | Data Availability                    |                                  |                                       |                      |                        |                                      |                                  |                                       |                      |                        |
|---------------------------------------|-------------------------------------|-----------------------|----------|-------|-------|--------------------------------------|----------------------------------|---------------------------------------|----------------------|------------------------|--------------------------------------|----------------------------------|---------------------------------------|----------------------|------------------------|
|                                       |                                     | Enrollment<br>Period  | Controls | Cases | Total | Mother,<br>Ever-Smoking <sup>a</sup> | Mother,<br>Prenatal <sup>b</sup> | Mother,<br>Preconception <sup>c</sup> | Mother,<br>Pregnancy | Mother,<br>After Birth | Father,<br>Ever-Smoking <sup>a</sup> | Father,<br>Prenatal <sup>b</sup> | Father,<br>Preconception <sup>c</sup> | Father,<br>Pregnancy | Father,<br>After Birth |
| Podvin, 2006 (1)                      | United States, Washington           | 1974-2009             | 936      | 94    | 1030  | n/a                                  | X #                              | X #                                   | X #                  | n/a                    | n/a                                  | n/a                              | n/a                                   | n/a                  | n/a                    |
| J.D. Dockerty, unpublished data       | New Zealand (NZCCR) <sup>d</sup>    | 1990-1995             | 303      | 22    | 325   | X                                    | X #                              | X #                                   | X #                  | X                      | X                                    | X #                              | n/a                                   | n/a                  | X                      |
| Pang, 2003 (2)                        | United Kingdom (UKCCS) <sup>d</sup> | 1991-1996             | 3450     | 248   | 3698  | X                                    | X #                              | X #                                   | X #                  | X                      | X                                    | X #                              | n/a                                   | n/a                  | X                      |
| Schuz, 1999 (3)                       | Germany (GCCR)                      | 1992-1997             | 2456     | 130   | 2586  | n/a                                  | X #                              | X #                                   | X #                  | X #                    | n/a                                  | X #                              | X #                                   | X #                  | X #                    |
| Menegaux, 2005 (4)                    | France (Adele)                      | 1995-1999             | 287      | 35    | 322   | X                                    | X #                              | n/a                                   | X #                  | X #                    | X                                    | X #                              | X #                                   | n/a                  | X #                    |
| C. Wesseling, unpublished data        | Costa Rica                          | 1995-2000             | 579      | 39    | 618   | X                                    | X #                              | X                                     | X                    | X                      | X                                    | X                                | X                                     | X                    | X                      |
| Metayer, 2013 (5)                     | United States, California (NCCLS)   | 1995-2008             | 1226     | 145   | 1371  | X                                    | X #                              | X #                                   | X #                  | X #                    | X                                    | X #                              | X #                                   | X                    | X                      |
| Klimentopoulou, 2012 (6)              | Greece (NARECHEM)                   | 1996-2012             | 1180     | 119   | 1299  | n/a                                  | X #                              | X                                     | X                    | X                      | n/a                                  | X                                | X                                     | X                    | X                      |
| J.M. Mejia-Arangure, unpublished data | Mexico (MIGICCL)                    | 1998-2007             | 520      | 257   | 777   | n/a                                  | X                                | X                                     | X                    | X                      | n/a                                  | X                                | X                                     | X                    | X                      |
| Mattioli, 2014 (7)                    | Italy (SETIL) <sup>d</sup>          | 1999-2002             | 129      | 83    | 212   | X                                    | X #                              | n/a                                   | X #                  | n/a                    | X                                    | X #                              | X #                                   | X #                  | n/a                    |
| Ferreira, 2012 (8)                    | Brazil                              | 1999-2007             | 422      | 59    | 481   | n/a                                  | X #                              | X #                                   | X #                  | X #                    | n/a                                  | n/a                              | n/a                                   | n/a                  | n/a                    |
| Rudant, 2008 (9)                      | France (ESCALE)                     | 2003-2005             | 1681     | 99    | 1780  | n/a                                  | X #                              | n/a                                   | X #                  | n/a                    | n/a                                  | X #                              | X #                                   | X #                  | X #                    |
| Total Studies [X(#)]:                 |                                     |                       |          |       |       | 6                                    | 12 (11)                          | 9 (6)                                 | 12 (9)               | 9 (4)                  | 6                                    | 10 (7)                           | 8 (5)                                 | 7 (3)                | 9 (3)                  |
| Total Participants [X(#)]:            |                                     |                       |          |       |       | 6518                                 | 14420 (13478)                    | 11325 (8613)                          | 14409 (11528)        | 11451 (4672)           | 6091                                 | 12346 (9661)                     | 8722 (6038)                           | 8308 (4460)          | 12424 (4512)           |
| Range of available data per study:    |                                     |                       |          |       |       | 99% to 100%                          | 95% to 100%                      | 20% <sup>e</sup> to 100%              | 95% to 100%          | 97% to 100%            | 86% to 100%                          | 85% to 100%                      | 84% to 100%                           | 84% to 100%          | 81% to 100%            |

Abbreviations: ESCALE: Epidemiologic Study on Childhood Cancer and Leukemia; GCCR: German Childhood Cancer Registry; MIGICCL: Mexican Inter-Institutional Group for the Identification of the Causes of Childhood Leukemia; NARECHEM: Nationwide Registration for Childhood Hematological Malignancies; NCCLS: Northern California Childhood Leukemia Study; SETIL: Study on the Etiology of Childhood Lymphohematopoietic Malignancies; UKCCS: United Kingdom Childhood Cancer Study; X: available data (yes/no); #: available data (cigarettes per day); n/a: not available

<sup>a</sup>Ever is defined as having ever smoked regularly, ever smoked 1 cigarette per day for six months to one year, or smoked 100 cigarettes or more in the mother or father's lifetime

<sup>b</sup>Prenatal is defined as any time up to the child's birth

<sup>c</sup>Preconception is defined as between 3 months and 1 year before conception, or time is not defined

<sup>d</sup>Study was individually-matched

<sup>e</sup>20% applies to United States, Washington only

**Web Table 2.** Description of Studies Participating in the Analysis of Parental Smoking and Risk of Childhood Acute Myeloid Leukemia: The Childhood Leukemia International Consortium, 1974-2012

| First Author, Year (Reference No.)    | Study Location, Name                   | Period of Recruitment   | Study Design                                                                                                                                      | Control Source                                                               | Case Source                                                                                                  |
|---------------------------------------|----------------------------------------|-------------------------|---------------------------------------------------------------------------------------------------------------------------------------------------|------------------------------------------------------------------------------|--------------------------------------------------------------------------------------------------------------|
| Ferreira, 2012 (8)                    | Brazil                                 | 1999-2007               | Case-control study; Frequency matching (focus on infant leukemia)                                                                                 | Hospitals                                                                    | Hospitals (in The Brazilian Collaborative Study Group, BCSG)                                                 |
| C. Wesseling, unpublished data        | Costa Rica                             | 2001-2003               | Case-control study; Frequency matching                                                                                                            | Birth Registry (nationwide)                                                  | Population-based cancer registry & hospitals (nationwide)                                                    |
| Menegaux, 2005 (4)                    | France, Adele                          | 1995-1999               | Case-control study; Frequency matching & case-parental trios                                                                                      | Hospitals (same as cases)                                                    | Hospitals                                                                                                    |
| Rudant, 2008 (9)                      | France, ESCALE                         | 2003-2004               | Case-control study; Frequency matching; case-parental trios                                                                                       | Population quotas by age, sex, region (nationwide)                           | Population-based cancer registry (nationwide)                                                                |
| Schuz, 1999 (3)                       | Germany, GCCR                          | 1980-1996               | Pooled case-control study (2 time periods, see case eligibility criteria); Individual matched control recruitment; Frequency-matching in analyses | Population-based registry (community-based but complete nationwide coverage) | Population-based cancer registry (nationwide)                                                                |
| Klimentopoulou, 2012 (6)              | Greece, NARECHEM                       | 1996-present            | Case-control study; Individual matching                                                                                                           | Hospital, age and gender matched                                             | Epidemiological-clinical database (Nationwide Registry for Childhood Haematological malignancies, NARECHEM ) |
| Mattioli, 2014 (7)                    | Italy, SETIL                           | 1998-2001               | Case-control study; Individual matching                                                                                                           | Registry (nationwide)                                                        | Clinical cancer registry (nationwide)                                                                        |
| J.M. Mejia-Arangure, unpublished data | Mexico, MIGICCL                        | 1998-2007               | Case-control study; Frequency matching (age, sex, institution)                                                                                    | Hospitals (secondary-care groups)                                            | Hospitals                                                                                                    |
| J.D. Dockerty, unpublished data       | New Zealand, NZCCS                     | 1990-93                 | Case-control study; Individual matching                                                                                                           | Birth Registry (nationwide)                                                  | National Cancer Registry; Children's Cancer Registry; and Hospital Admission/Discharge System (nationwide)   |
| Pang, 2003 (2)                        | United Kingdom, UKCCS                  | 1991-98                 | Case-control study; Individual matching; Case-parental trios                                                                                      | General practionner (GP) registry (nationwide)                               | General practionner (GP) registries (nationwide)                                                             |
| Metayer, 2013 (5)                     | United States, California State, NCCLS | 1995-2008; 2010-present | Case-control study; Individual matching                                                                                                           | Birth registry (statewide)                                                   | Hospitals                                                                                                    |
| Podvin, 2006 (1)                      | United States, Washington State        | 1974-2009               | Case-control study; Frequency matching                                                                                                            | Birth registry (statewide)                                                   | Population-based cancer registry (Regional 1974-1993; statewide 1994-2009)                                   |

Abbreviations: ESCALE: Epidemiologic Study on Childhood Cancer and Leukemia; GCCR: German Childhood Cancer Registry; MIGICCL: Mexican Inter-Institutional Group for the Identification of the Causes of Childhood Leukemia; NARECHEM: Nationwide Registration for Childhood Hematological Malignancies; NCCLS: Northern California Childhood Leukemia Study; NZCCS: New Zealand Childhood Cancer Study; SETIL: Study on the Etiology of Childhood Lymphohematopoietic Malignancies; UKCCS: United Kingdom Childhood Cancer Study



| Web Table 3. Translated interviews for maternal and paternal smoking, by study and period of interest, Childhood Leukemia International Consortium, 1974-2012 |                                                                                    |                                                                                                                                                                                       |                                                                                                                                                                                                          |                                                                                                                                                                                                          |                                                                                                                                                                                                                                                            |                                                                                                |
|---------------------------------------------------------------------------------------------------------------------------------------------------------------|------------------------------------------------------------------------------------|---------------------------------------------------------------------------------------------------------------------------------------------------------------------------------------|----------------------------------------------------------------------------------------------------------------------------------------------------------------------------------------------------------|----------------------------------------------------------------------------------------------------------------------------------------------------------------------------------------------------------|------------------------------------------------------------------------------------------------------------------------------------------------------------------------------------------------------------------------------------------------------------|------------------------------------------------------------------------------------------------|
| First Author, Year (Reference No.)                                                                                                                            | Country, Study Name                                                                | Lifetime                                                                                                                                                                              | Preconception                                                                                                                                                                                            | Pregnancy                                                                                                                                                                                                | After Birth                                                                                                                                                                                                                                                | Other                                                                                          |
| Pang, 2003 (2)                                                                                                                                                | United Kingdom, UKCCS                                                              | Have you ever regularly smoked at least one cigarette a day for at least a year?                                                                                                      | On average how many did you smoke per day one year before child was born?                                                                                                                                | Questions regarding the 3 months before pregnancy, first trimester, second trimester, and third trimester are not available                                                                              | How many one year after child was born?                                                                                                                                                                                                                    |                                                                                                |
| J.D. Dockerty, unpublished data, 1990-1995                                                                                                                    | New Zealand                                                                        | Have you ever regularly smoked at least one cigarette a day for at least a year?                                                                                                      | On average how many did you smoke per day one year before child was born?                                                                                                                                | Questions regarding the 3 months before pregnancy, first trimester, second trimester, and third trimester are not available                                                                              | How many one year after child was born?                                                                                                                                                                                                                    |                                                                                                |
| Klimentopoulou, 2012 (6)                                                                                                                                      | Greece                                                                             | Does the father smoke or did he smoke in the past?<br>Does the mother smoke or did she smoke in the past?                                                                             |                                                                                                                                                                                                          | Did she smoke during pregnancy?                                                                                                                                                                          |                                                                                                                                                                                                                                                            |                                                                                                |
| Menegaux, 2005 (4)                                                                                                                                            | France, Adele (translated from French)                                             | Have you smoked at least one cigarette per day for 6 months? (translated) If yes, what age did you start? Do you still smoke now?                                                     |                                                                                                                                                                                                          |                                                                                                                                                                                                          |                                                                                                                                                                                                                                                            |                                                                                                |
| Rudant, 2008 (9)                                                                                                                                              | France, ESCALE (translated from French)                                            | Have you ever smoked regularly? At what age did you start? Does the father smoke regularly? Did he stop? At what age? How many did you smoke?                                         |                                                                                                                                                                                                          | Did you smoke when you were pregnant?                                                                                                                                                                    |                                                                                                                                                                                                                                                            |                                                                                                |
| C. Wesseling, unpublished data, 1995-2000                                                                                                                     | Costa Rica (translated from Spanish)                                               | Have you smoked at some point in your life? At what age did you begin smoking?                                                                                                        | Did you smoke the year before becoming pregnant with child? How many per day/week?                                                                                                                       | Did you smoke during your pregnancy with child? During which stages (trimesters) did you smoke? How many per day/week?                                                                                   | Did you smoke after the birth of child?                                                                                                                                                                                                                    | Have you stopped smoking?                                                                      |
| Metayer, 2013 (5)                                                                                                                                             | United States, NCCLS (using Phase 3 questionnaire to approximate all three phases) | M&F: Have you ever smoked at least one hundred cigarettes in your entire life? How old were you when you started smoking?                                                             | M&F: Did you smoke during the 3 months before your pregnancy with [Child]? Approximately how many cigarettes per day did you smoke during that time?                                                     | M only: Did you smoke during the time you were pregnant with [child]? Approximately how many cigarettes per day did you smoke during that time?                                                          | M only: Did you smoke while breast-feeding [child]? Approximately how many cigarettes per day did you smoke during that time? Not including the time you were breastfeeding, did you smoke between the time the child was born and his/her third birthday? | M&F: Do you smoke now? In what month and year did you last quit smoking?                       |
| Schuz, 1999 (3)                                                                                                                                               | Germany (translated from German)                                                   |                                                                                                                                                                                       | M&F: How many cigarettes per day in the last 3 months before pregnancy?                                                                                                                                  | How many cigarettes per day during pregnancy?                                                                                                                                                            | How many cigarettes per day in the 3 months after birth?                                                                                                                                                                                                   |                                                                                                |
| Ferreira, 2012 (8)                                                                                                                                            | Brazil                                                                             | Do you smoke? Have you ever smoked in any part of your life? How long have you smoked? How old were you when you first started smoking regularly? How long ago did you quit smoking?  | Approximately how many cigarettes did you smoke before and during the pregnancy and breastfeeding of your child? [pre-gestational trimester, 1st trimester, 2nd trimester, 3rd trimester, breastfeeding] | Approximately how many cigarettes did you smoke before and during the pregnancy and breastfeeding of your child? [pre-gestational trimester, 1st trimester, 2nd trimester, 3rd trimester, breastfeeding] | Approximately how many cigarettes did you smoke before and during the pregnancy and breastfeeding of your child? [pre-gestational trimester, 1st trimester, 2nd trimester, 3rd trimester, breastfeeding]                                                   | During your pregnancy did someone who lived in your house smoke?                               |
| Mattioli, 2014 (7)                                                                                                                                            | Italy (translated)                                                                 | M&F: Do you smoke or have you ever smoked regularly (at least once a day for 6 months?) If yes, what year did you start? Smoke still? If you stopped smoking, what year did you stop? | Father only: Did you smoke during pregnancy with the child or within 6 months prior to conception of the child?                                                                                          | Did you smoke during the pregnancy with the child? If yes, what trimester? How many per day?                                                                                                             |                                                                                                                                                                                                                                                            |                                                                                                |
| J.M. Mejia-Arangure, unpublished data, 1998-2007                                                                                                              | Mexico, MIGICCL (translated from Spanish)                                          | M&F: Have you smoked at some point? You've never smoked? At what age did you begin smoking? During some point in your life did you stop smoking? What age? Which time period?         | M&F: Before pregnancy with the child did you smoke? Which years? How many cigarettes did you smoke?                                                                                                      | M&F: During the pregnancy of the child, did you smoke? During what months of the pregnancy did you smoke? How many cigarettes did you smoke?                                                             | M&F: After the child was born, did you smoke? What years did you smoke? How many cigarettes did you smoke?                                                                                                                                                 | M&F: Do you smoke now? How many cigarettes do you smoke now? At what age did you stop smoking? |
| Podvin, 2006 (1)                                                                                                                                              | United States, Washington                                                          |                                                                                                                                                                                       |                                                                                                                                                                                                          | 2003-Present: Collected as number of cigarettes, by trimester<br>1984-2002: Collected as smoking status during pregnancy (follow up questions asked about #cigarettes by trimester)                      |                                                                                                                                                                                                                                                            |                                                                                                |

Abbreviations: : ESCALE: Epidemiologic Study on Childhood Cancer and Leukemia; F: question directed towards father; GCCR: German Childhood Cancer Registry; M: question directed towards mother; MIGICCL: Mexican Inter-Institutional Group for the Identification of the Causes of Childhood Leukemia; NARECHEM: Nationwide Registration for Childhood Hematological Malignancies; NCCLS: Northern California Childhood Leukemia Study; NZCCS: New Zealand Childhood Cancer Study; SETIL: Study on the Etiology of Childhood Lymphohematopoietic Malignancies; UKCCS: United Kingdom Childhood Cancer Study

**Web Table 4.** Categorization of Race/Ethnicity Variables by Study, Childhood Leukemia International Consortium, 1974-2012

| <b>First Author, Year (Reference No.)</b>        | <b>Study Location (Study Name)</b> | <b>Original Category</b>                                                                                                               | <b>Standardized Category</b>                                                                                                                                                                                                                                         |
|--------------------------------------------------|------------------------------------|----------------------------------------------------------------------------------------------------------------------------------------|----------------------------------------------------------------------------------------------------------------------------------------------------------------------------------------------------------------------------------------------------------------------|
| Podvin, 2006 (1)                                 | United States, Washington          | White<br>Black<br>Native American<br>Chinese<br>Japanese<br>Filipino<br>Other Asian<br>Hispanic<br>Other Non-White                     | Non-Hispanic White<br>Non-Hispanic Other<br>Non-Hispanic Other<br>Non-Hispanic Other<br>Non-Hispanic Other<br>Non-Hispanic Other<br>Non-Hispanic Other<br>Hispanic<br>Hispanic<br>Non-Hispanic Other                                                                 |
| J.D. Dockerty, unpublished data, 1990-1995       | New Zealand (NZCCS)                | NZ European<br>Maori<br>Pacific Island<br>Other                                                                                        | Non-Hispanic White<br>Non-Hispanic Other<br>Non-Hispanic Other<br>Non-Hispanic Other                                                                                                                                                                                 |
| Pang, 2003 (2)                                   | United Kingdom (UKCCS)             | White<br>Non-White<br>Mixed<br>Other<br>No Dad<br>Not Known                                                                            | Non-Hispanic White<br>Non-Hispanic Other<br>Non-Hispanic White<br>Non-Hispanic White<br>Non-Hispanic White<br>Non-Hispanic White                                                                                                                                     |
| Schuz, 1999 (3)                                  | Germany (GCCR)                     | NA                                                                                                                                     | Non-Hispanic White                                                                                                                                                                                                                                                   |
| Menegaux, 2005 (4); Rudant, 2008 (9)             | France (Adele & ESCALE)            | Non-Caucasian<br>Caucasian                                                                                                             | Non-Hispanic Other<br>Non-Hispanic White                                                                                                                                                                                                                             |
| C. Wesseling, unpublished data, 1995-2000        | Costa Rica                         | NA                                                                                                                                     | Hispanic                                                                                                                                                                                                                                                             |
| Metayer, 2013 (5)                                | United States, California (NCCLS)  | Hispanic<br>Non-Hispanic White<br>Non-Hispanic Other                                                                                   | Hispanic<br>Non-Hispanic White<br>Non-Hispanic Other                                                                                                                                                                                                                 |
| Klimentopoulou, 2012 (6)                         | Greece (NARECHEM)                  | Greek<br>Russian<br>Albania<br>Poland<br>Georgia<br>Moldavia<br>Armenia<br>Romania<br>Bulgaria<br>Kazakhstan<br>Lithuania<br>Sri Lanka | Non-Hispanic White<br>Non-Hispanic White<br>Non-Hispanic White<br>Non-Hispanic White<br>Non-Hispanic White<br>Non-Hispanic White<br>Non-Hispanic Other<br>Non-Hispanic White<br>Non-Hispanic White<br>Non-Hispanic Other<br>Non-Hispanic White<br>Non-Hispanic Other |
| J.M. Mejia-Arangure, unpublished data, 1998-2007 | Mexico (MIGICCL)                   | Hispanic                                                                                                                               | Hispanic                                                                                                                                                                                                                                                             |
| Mattioli, 2014 (7)                               | Italy (SETIL)                      | NA                                                                                                                                     | Non-Hispanic White**                                                                                                                                                                                                                                                 |
| Ferreira, 2012 (8)                               | Brazil                             | White<br>Non-White<br>Japanese                                                                                                         | Non-Hispanic White<br>Non-Hispanic Other<br>Non-Hispanic Other                                                                                                                                                                                                       |

Abbreviations: : ESCALE: Epidemiologic Study on Childhood Cancer and Leukemia; GCCR: German Childhood Cancer Registry; MIGICCL: Mexican Inter-Institutional Group for the Identification of the Causes of Childhood Leukemia; NARECHEM: Nationwide Registration for Childhood Hematological Malignancies; NCCLS: Northern California Childhood Leukemia Study; NZCCS: New Zealand Childhood Cancer Study; SETIL: Study on the Etiology of Childhood Lymphohematopoietic Malignancies; UKCCS: United Kingdom Childhood Cancer Study  
NA indicates data not available/provided

\*In all previous UKCCS analyses, all groups were considered White except the Non-White group

\*\*Based on demographic data

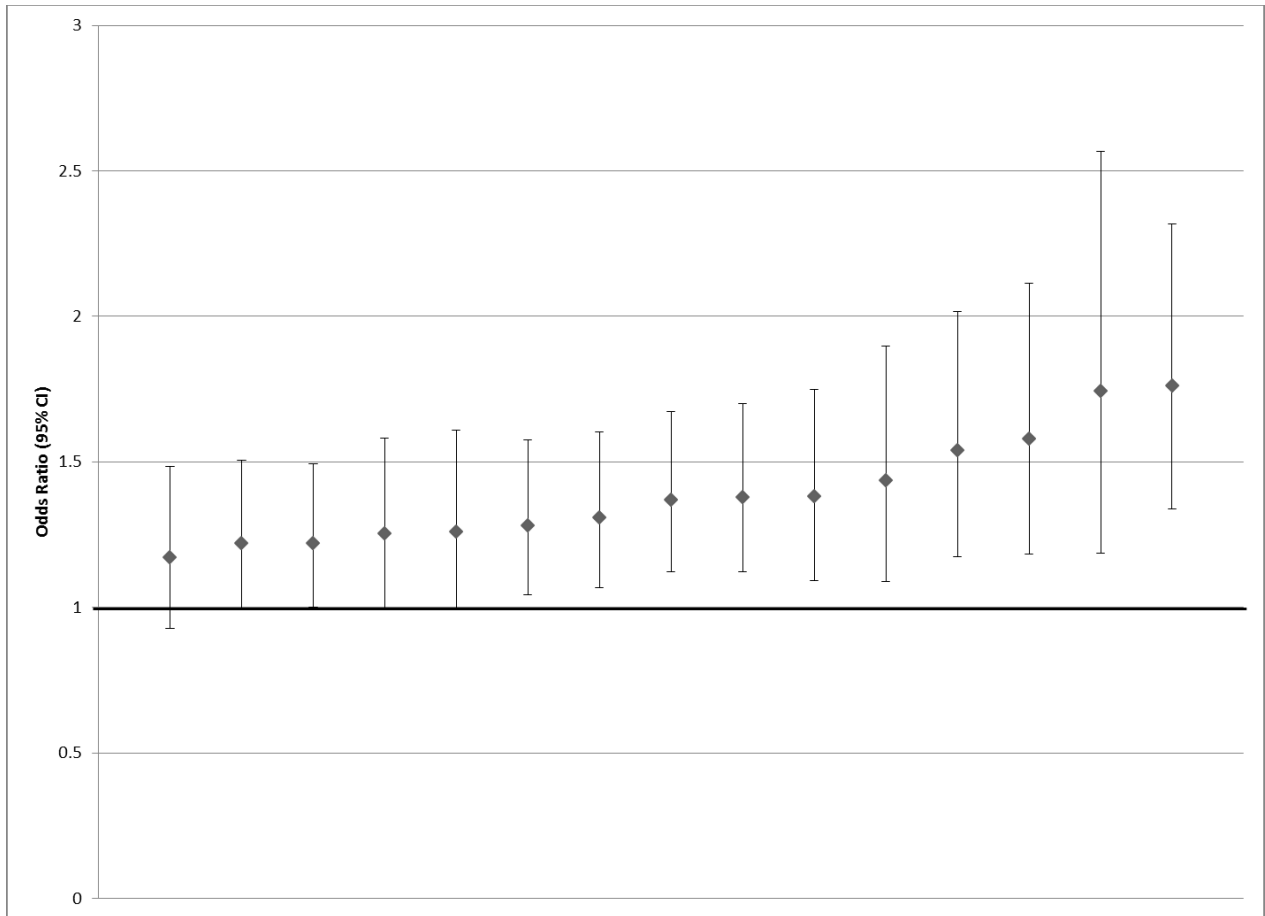

**Web Figure 1.** Sensitivity Analysis for Paternal Ever-Smoking, Removing Two Studies at a Time, Resulting in 15 Combinations of 4 studies. Abbreviations: CI: Confidence Interval.

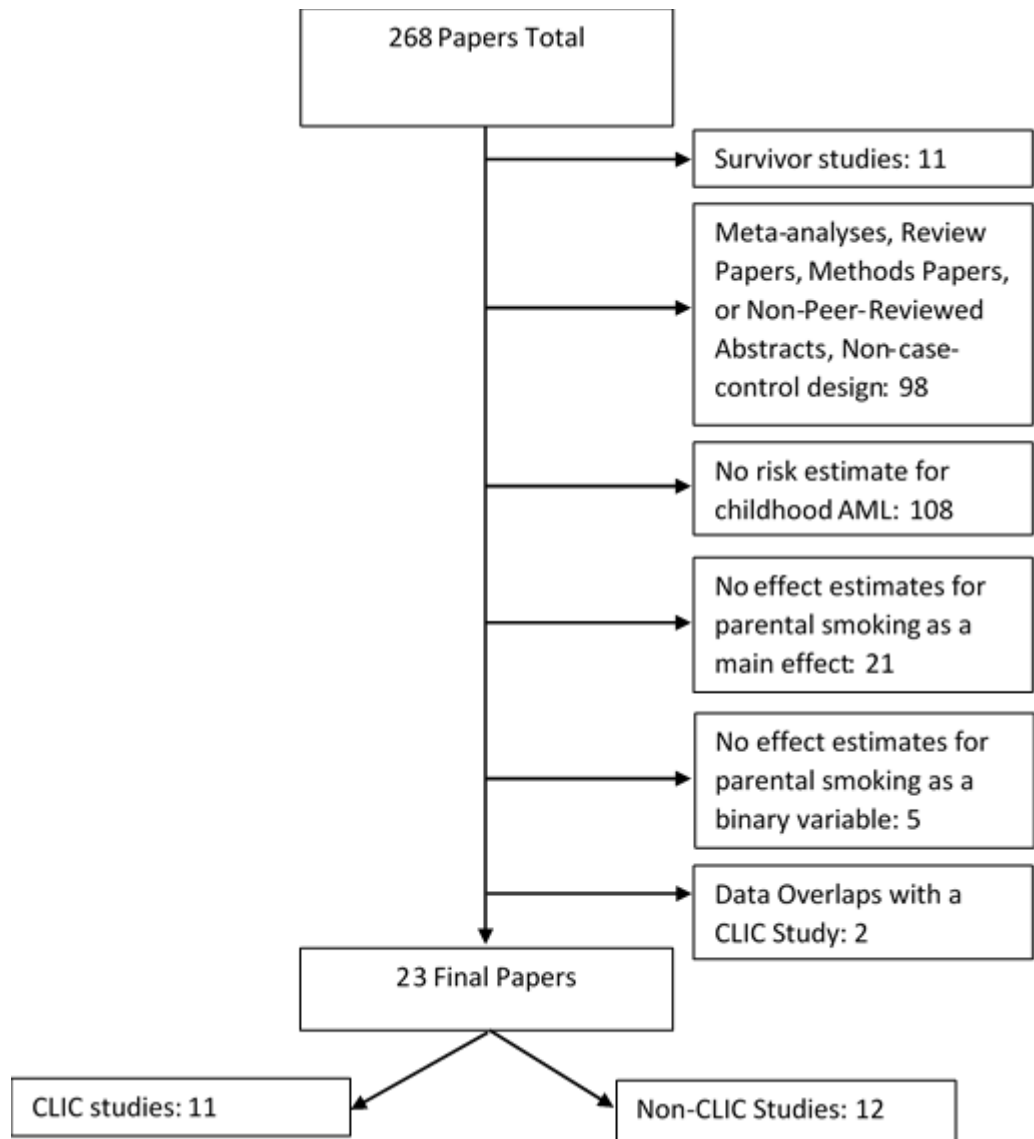

**Web Figure 2.** Flow diagram of exclusion criteria for systematic literature review conducted for parental smoking and risk of childhood acute myeloid leukemia. The following search term was used: “(pediatric OR childhood) AND leukemia AND (tobacco OR smok\*) AND (parent\* OR maternal OR paternal)” in PubMed, Embase and Web of Science; reference lists of published review papers and meta-analyses were also screened.

Abbreviations: AML: Acute Myeloid Leukemia; CLIC: Childhood Leukemia International Consortium.

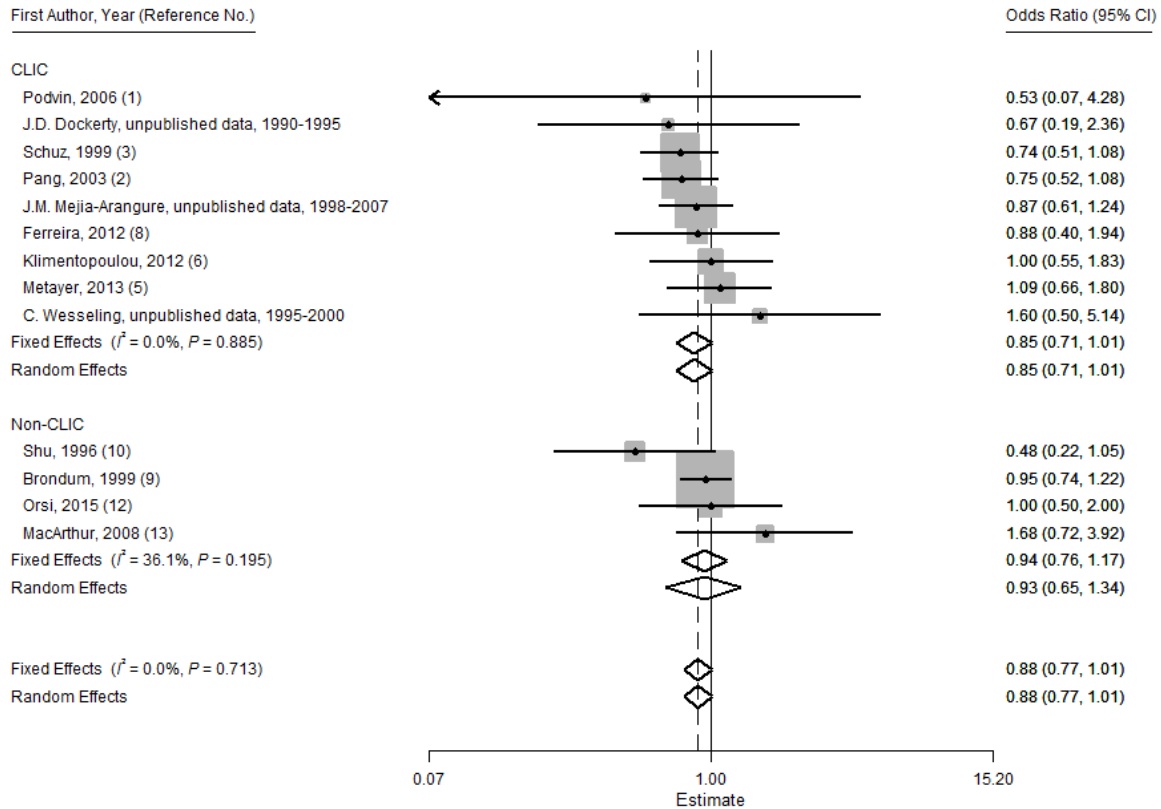

**Web Figure 3.** Study-specific Odds Ratios (ORs) and Fixed- and Random-effects Meta-analysis ORs for Maternal Smoking Before Pregnancy and Risk of Acute Myeloid Leukemia (AML) in Childhood Leukemia International Consortium (CLIC) and non-CLIC studies. Odds Ratios for CLIC studies were generated using original data.  $P$  value for heterogeneity between groups is 0.476. Abbreviations: CI: Confidence Interval; CLIC: Childhood Leukemia International Consortium

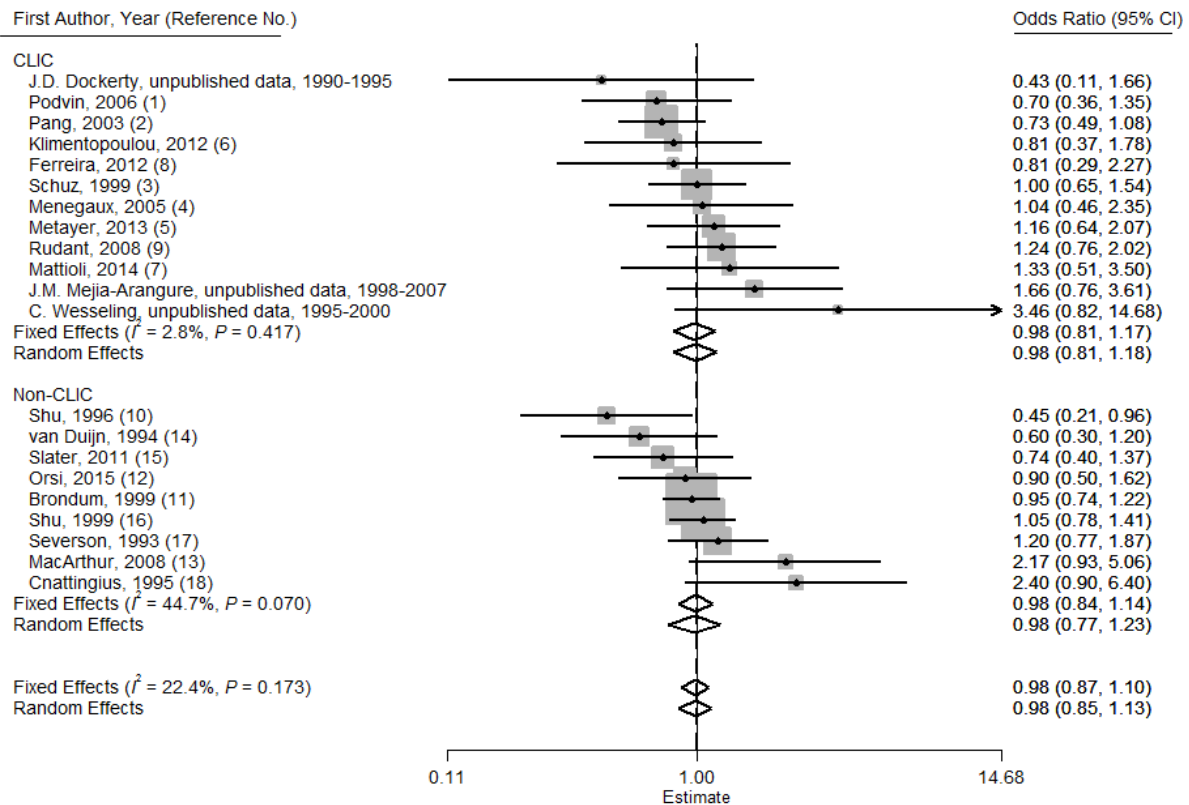

**Web Figure 4.** Study-specific Odds Ratios (ORs) and Fixed- and Random-effects Meta-analysis ORs for Maternal Smoking During Pregnancy and Risk of Childhood Acute Myeloid Leukemia (AML) in Childhood Leukemia International Consortium (CLIC) and non-CLIC studies. Estimates for CLIC studies were generated using original data.  $P$  value for heterogeneity between groups is 0.967. Abbreviations: CI: Confidence Interval; CLIC: Childhood Leukemia International Consortium.

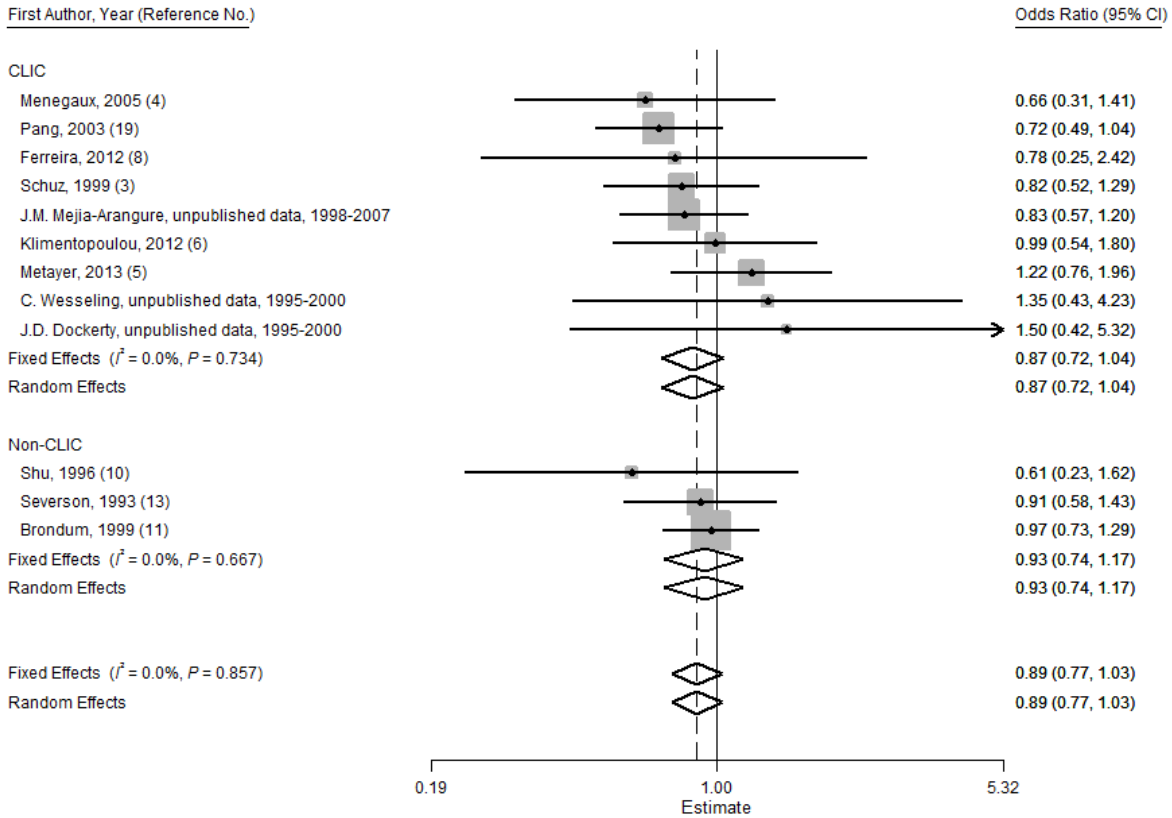

**Web Figure 5.** Study-specific Odds Ratios (ORs) and Fixed- and Random-effects Meta-analysis ORs for Maternal Smoking After Pregnancy and Risk of Childhood Acute Myeloid Leukemia (AML) in Childhood Leukemia International Consortium (CLIC) and non-CLIC studies. Estimates for CLIC studies were generated using original data.  $P$  value for heterogeneity between groups is 0.651. Abbreviations: CI: Confidence Interval; CLIC: Childhood Leukemia International Consortium.

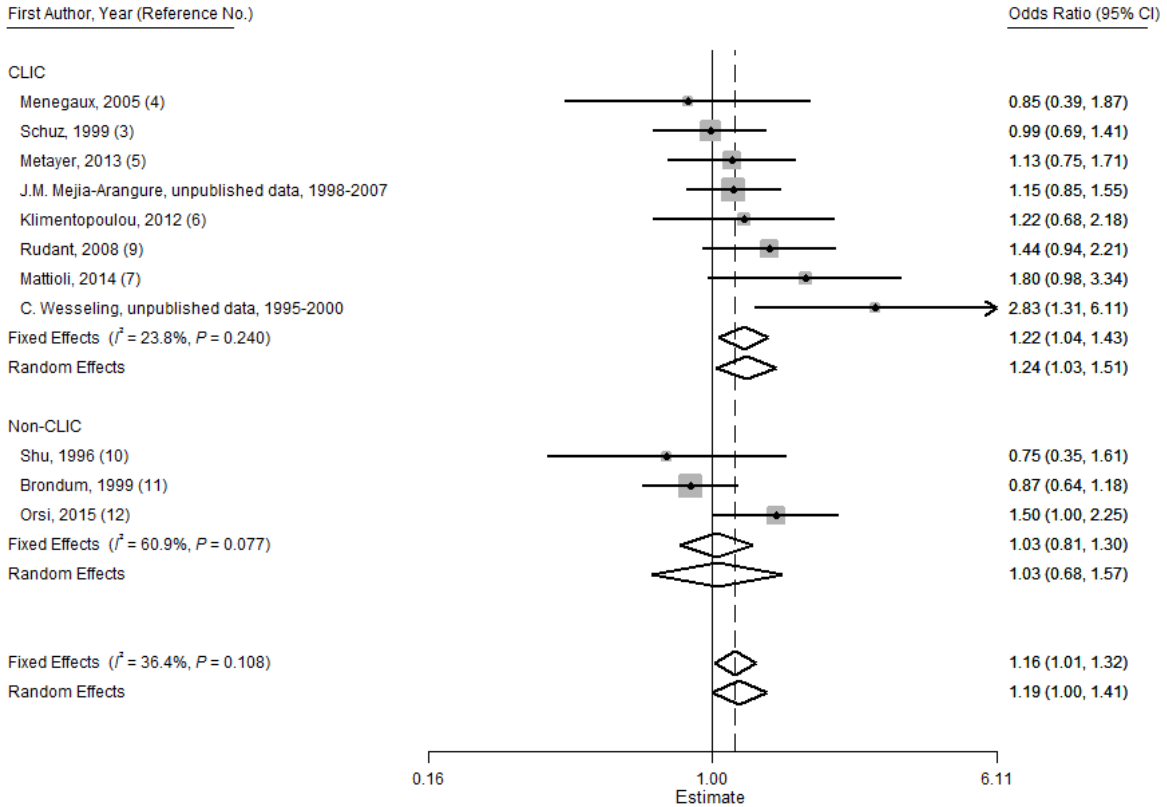

**Web Figure 6.** Study-specific Odds Ratios (ORs) and Fixed- and Random-effects Meta-analysis ORs for Paternal Smoking Before Pregnancy and Risk of Childhood Acute Myeloid Leukemia (AML) in Childhood Leukemia International Consortium (CLIC) and non-CLIC studies. Estimates for CLIC studies were generated using original data.  $P$  value for heterogeneity between groups is 0.233. Abbreviations: CI: Confidence Interval; CLIC: Childhood Leukemia International Consortium.



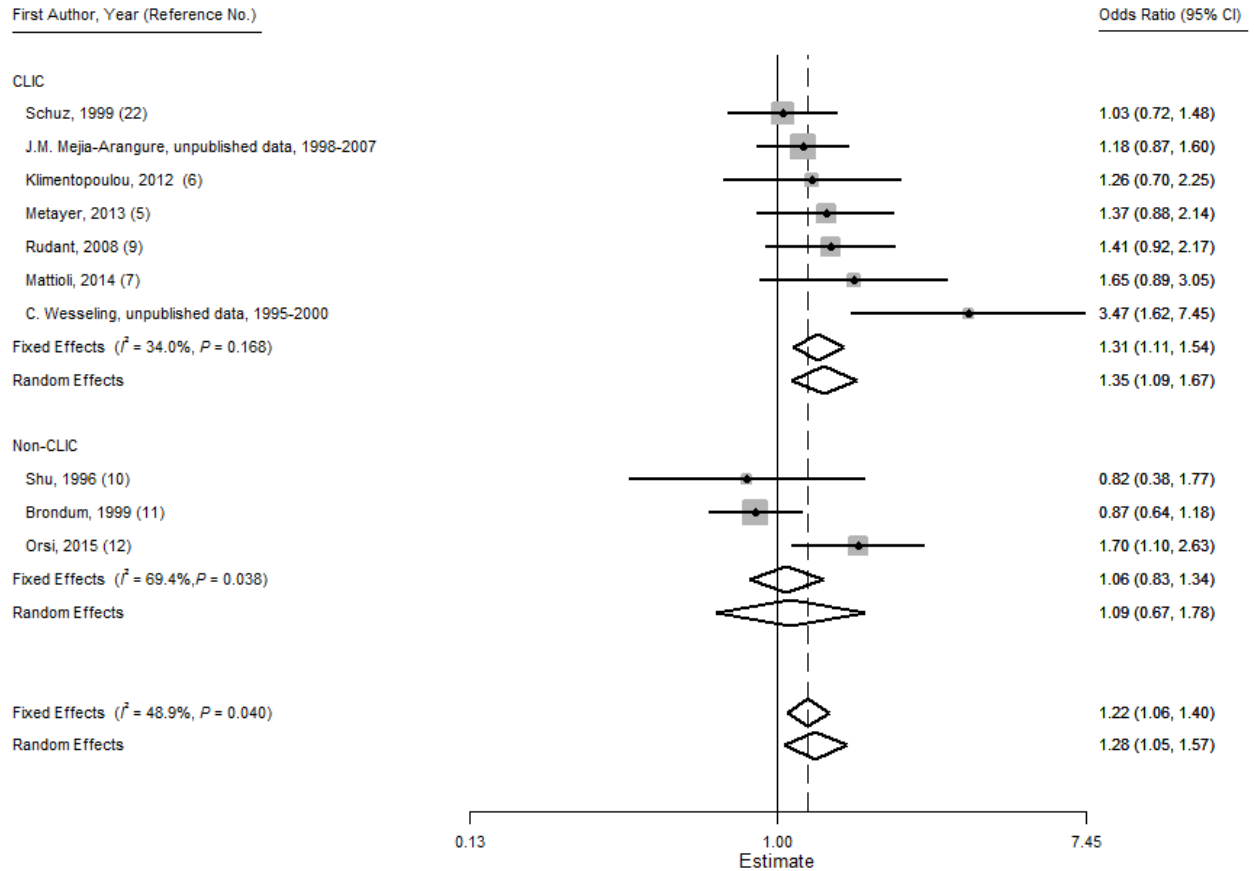

**Web Figure 7.** Study-specific Odds Ratios (ORs) and Fixed- and Random-effects Meta-analysis ORs for Paternal Smoking During Pregnancy and Risk of Childhood Acute Myeloid Leukemia (AML) in Childhood Leukemia International Consortium (CLIC) and non-CLIC studies. Estimates for CLIC studies were generated using original data.  $P$  value for heterogeneity between groups is 0.158. Abbreviations: CI: Confidence Interval; CLIC: Childhood Leukemia International Consortium.

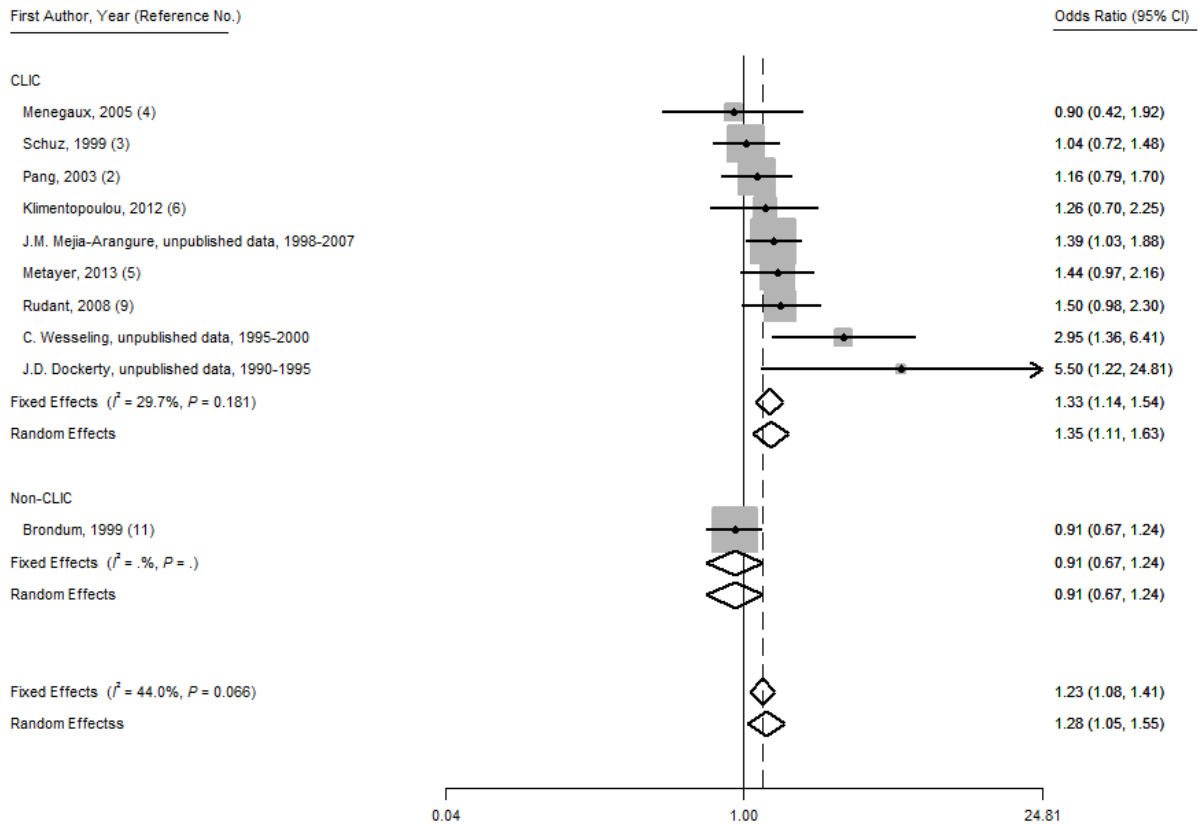

**Web Figure 8.** Study-specific Odds Ratios (ORs) and Fixed- and Random-effects Meta-analysis ORs for Paternal Smoking After Pregnancy and Risk of Childhood Acute Myeloid Leukemia (AML) in Childhood Leukemia International Consortium (CLIC) and non-CLIC studies. Estimates for CLIC studies were generated using original data.  $P$  value for heterogeneity between groups is 0.031. Abbreviations: CI: Confidence Interval; CLIC: Childhood Leukemia International Consortium.

## Web Materials Bibliography

1. Podvin D, Kuehn CM, Mueller BA, et al. Maternal and birth characteristics in relation to childhood leukaemia. *Paediatr Perinat Epidemiol* 2006;20(4):312-322.
2. Pang D, McNally R, Birch JM. Parental smoking and childhood cancer: results from the United Kingdom Childhood Cancer Study. *Br J Cancer* 2003;88(3):373-381.
3. Schuz J, Kaatsch P, Kaletsch U, et al. Association of childhood cancer with factors related to pregnancy and birth. *Int J Epidemiol* 1999;28(4):631-639.
4. Menegaux F, Steffen C, Bellec S, et al. Maternal coffee and alcohol consumption during pregnancy, parental smoking and risk of childhood acute leukaemia. *Cancer Detect Prev* 2005;29(6):487-493.
5. Metayer C, Zhang L, Wiemels JL, et al. Tobacco Smoke Exposure and the Risk of Childhood Acute Lymphoblastic and Myeloid Leukemias by Cytogenetic Subtype. *Cancer Epidemiol Biomarkers Prev* 2013;22(9):1600-1611.
6. Klimentopoulou A, Antonopoulos CN, Papadopoulou C, et al. Maternal smoking during pregnancy and risk for childhood leukemia: a nationwide case-control study in Greece and meta-analysis. *Pediatr Blood Cancer* 2012;58(3):344-351.
7. Mattioli S, Farioli A, Legittimo P, et al. Tobacco smoke and risk of childhood acute non-lymphocytic leukemia: findings from the SETIL study. *PLoS ONE* 2014;9(11):1-9.
8. Ferreira JD, Couto AC, Pombo-de-Oliveira MS, et al. Pregnancy, maternal tobacco smoking, and early age leukemia in Brazil. *Front Oncol* 2012;2(151):1-9.
9. Rudant J, Menegaux F, Leverger G, et al. Childhood hematopoietic malignancies and parental use of tobacco and alcohol: the ESCALE study (SFCE). *Cancer Causes Control* 2008;19(10):1277-1290.
10. Shu XO, Ross JA, Pendergrass TW, et al. Parental alcohol consumption, cigarette smoking, and risk of infant leukemia: a Childrens Cancer Group study. *J Natl Cancer Inst* 1996;88(1):24-31.
11. Brondum J, Shu XO, Steinbuch M, et al. Parental cigarette smoking and the risk of acute leukemia in children. *Cancer* 1999;85(6):1380-1388.
12. Orsi L, Rudant J, Ajrouche R, et al. Parental smoking, maternal alcohol, coffee and tea consumption during pregnancy, and childhood acute leukemia: the ESTELLE study. *Cancer Causes Control* 2015;26(7):1003-1017.
13. MacArthur AC, McBride ML, Spinelli JJ, et al. Risk of childhood leukemia associated with parental smoking and alcohol consumption prior to conception and during pregnancy: the cross-Canada childhood leukemia study. *Cancer Causes Control* 2008;19(3):283-295.
14. van Duijn CM, van Steensel-Moll HA, Coebergh JW, et al. Risk factors for childhood acute non-lymphocytic leukemia: an association with maternal alcohol consumption during pregnancy? *Cancer Epidemiol Biomarkers Prev* 1994;3(6):457-460.
15. Slater ME, Linabery AM, Blair CK, et al. Maternal prenatal cigarette, alcohol and illicit drug use and risk of infant leukaemia: a report from the Children's Oncology Group. *Paediatr Perinat Epidemiol* 2011;25(6):559-565.
16. Shu XO, Linet MS, Steinbuch M, et al. Breast-feeding and risk of childhood acute leukemia. *J Natl Cancer Inst* 1999;91(20):1765-1772.
17. Severson RK, Buckley JD, Woods WG, et al. Cigarette smoking and alcohol consumption by parents of children with acute myeloid leukemia: an analysis within morphological subgroups--a report from the Childrens Cancer Group. *Cancer Epidemiol Biomarkers Prev* 1993;2(5):433-439.
18. Cnattingius S, Zack M, Ekblom A, et al. Prenatal and neonatal risk factors for childhood myeloid leukemia. *Cancer Epidemiol Biomarkers Prev* 1995;4(5):441-445.
